# Supplementary material for: Halogen-bonded architectures of multivalent calix[4]arenes
Source: Royal Society of Chemistry journal article supplement (doi:10.1039/d2ce00193d), 2022-01-01
Supplement: d2ce00193d1.pdf [file d2ce00193d1.pdf]

## Electronic Supplementary Information

# Halogen-bonded architectures of multivalent calix[4]arenes

Maria Chiara Gullo, Luciano Marchiò, Alessandro Casnati and Laura Baldini\*

*Department of Chemistry, Life Sciences and Environmental Sustainability, University  
of Parma, 43124 Parma, Italy.*

Content:

Additional figures

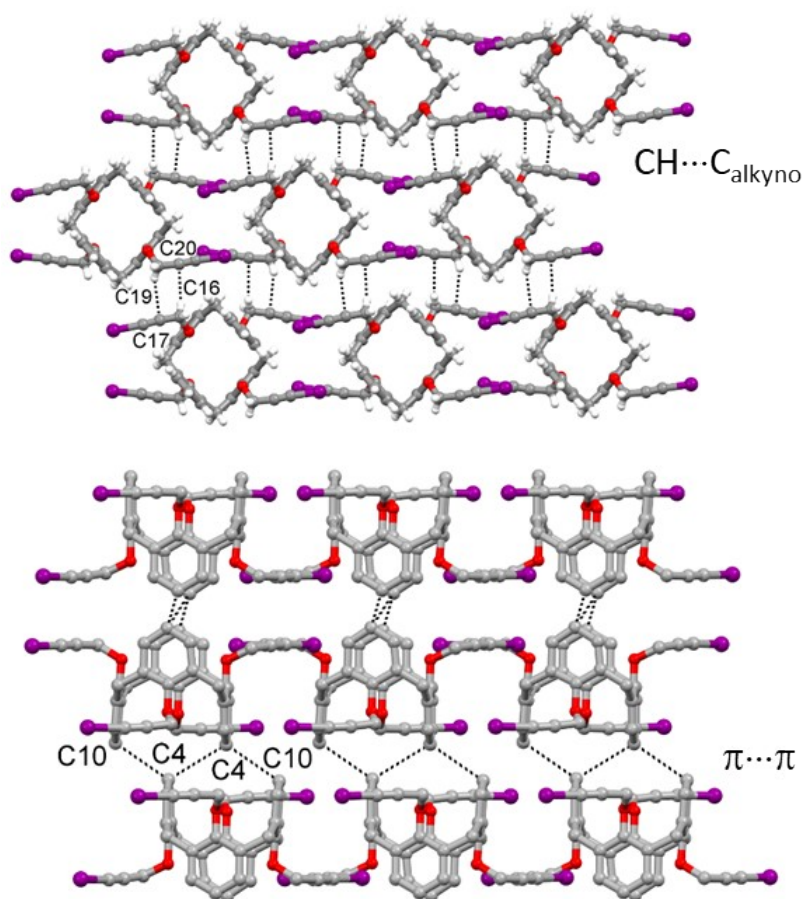

**Figure S1.** Portion of the crystal packing of **4** highlighting intermolecular interactions.

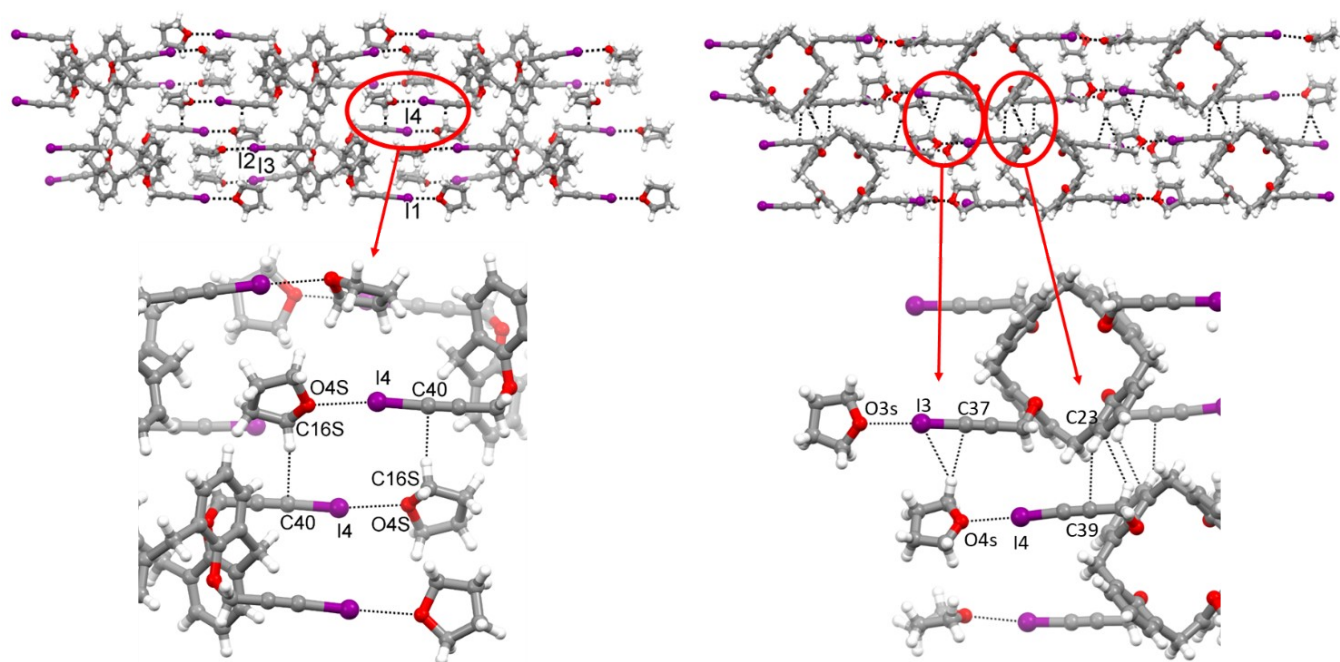

**Figure S2.** Portions of the crystal packing of **4** highlighting intermolecular interactions.

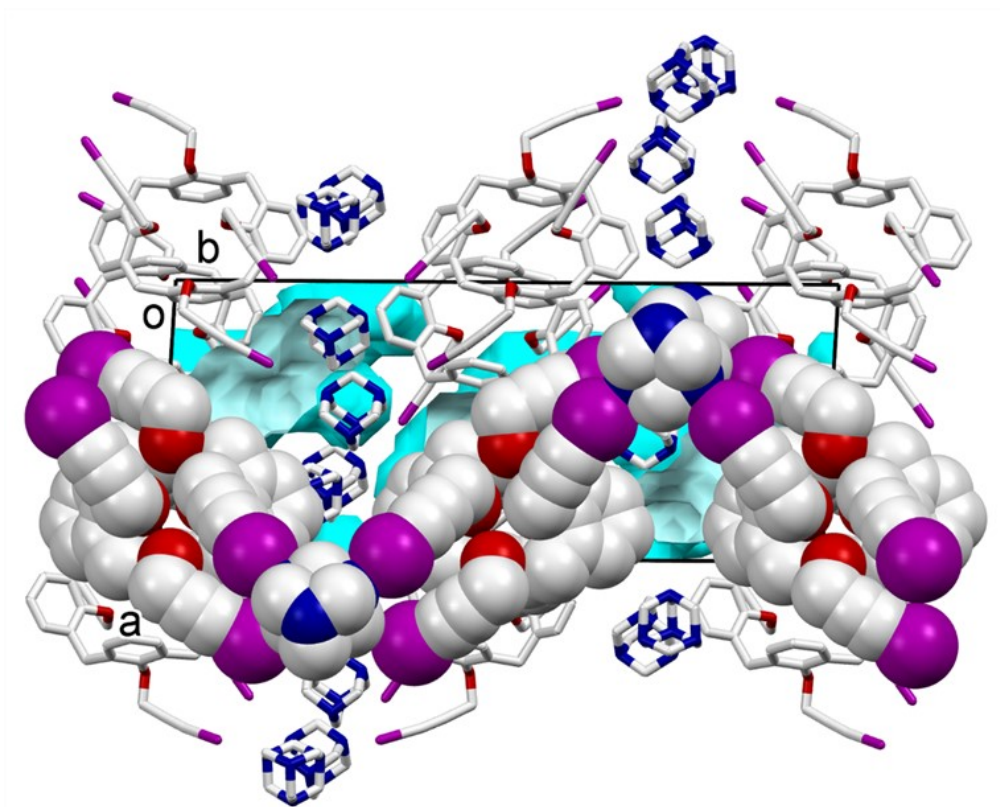

**Figure S3.** Portion of the crystal packing of  $1 \cdot 2\text{HMTA} \cdot 3/2\text{CH}_2\text{Cl}_2$  viewed along the *b* axis. A single supramolecular chain is depicted in the spacefill mode. Space occupied by dichloromethane molecules of crystallization is depicted in light blue. Probe radius 1.2 Å.

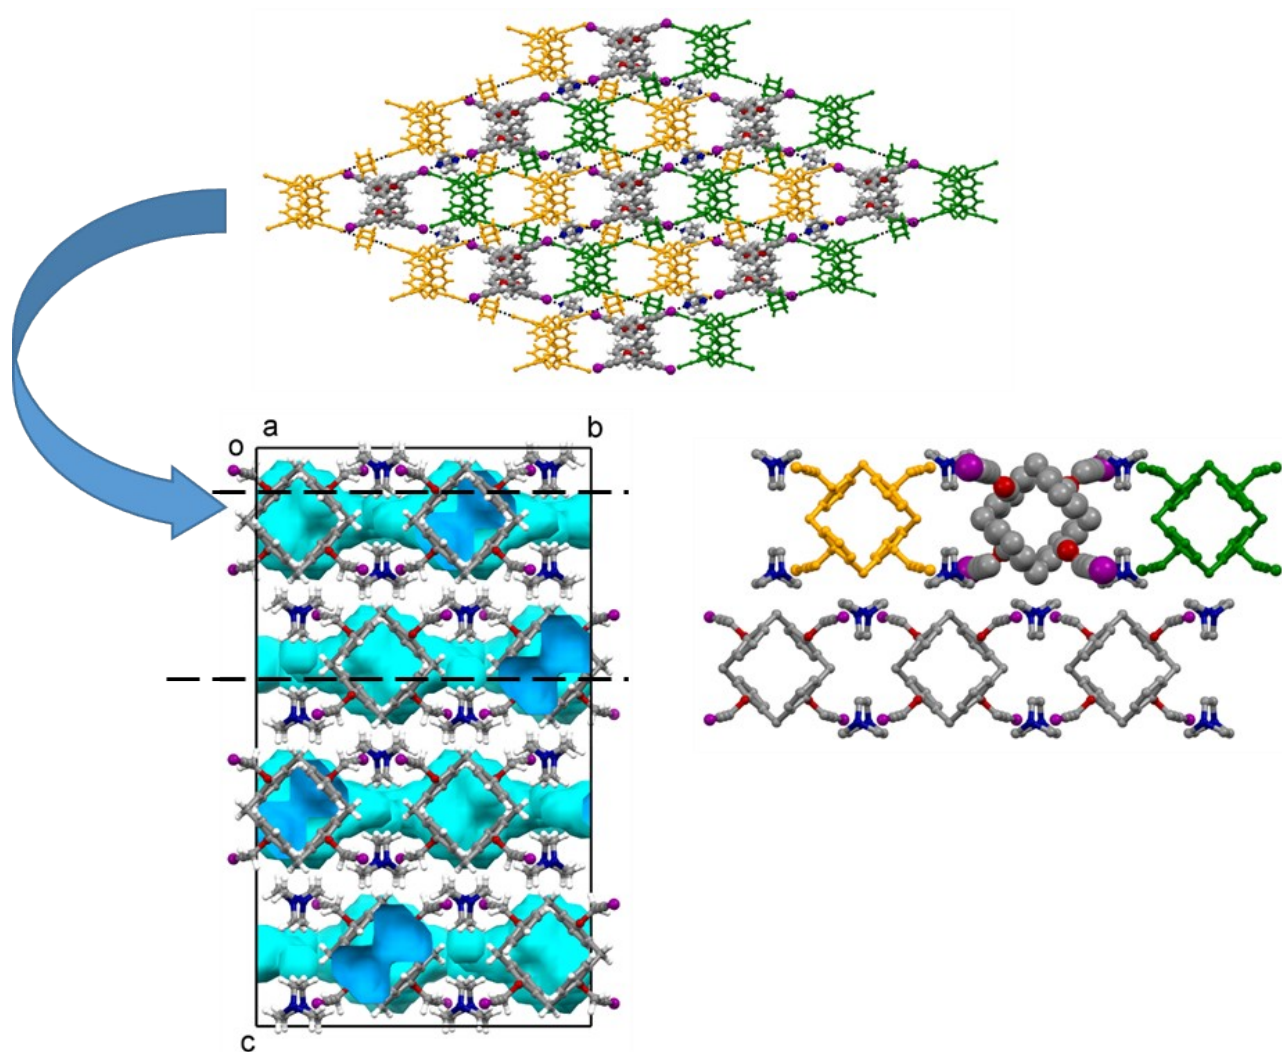

**Figure S4.** Crystal packing of 4·4DABCO·THF. Layers of interpenetrated networks are stacked along the *c* axis. Space occupied by THF molecules of crystallization is depicted in light blue. Probe radius 1.2 Å.

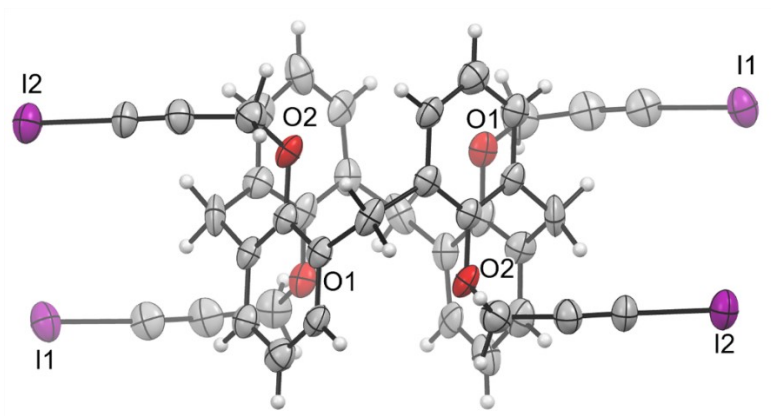

**Figure S5.** Ortep drawing of **4**, with thermal ellipsoids drawn at the 30% probability level.

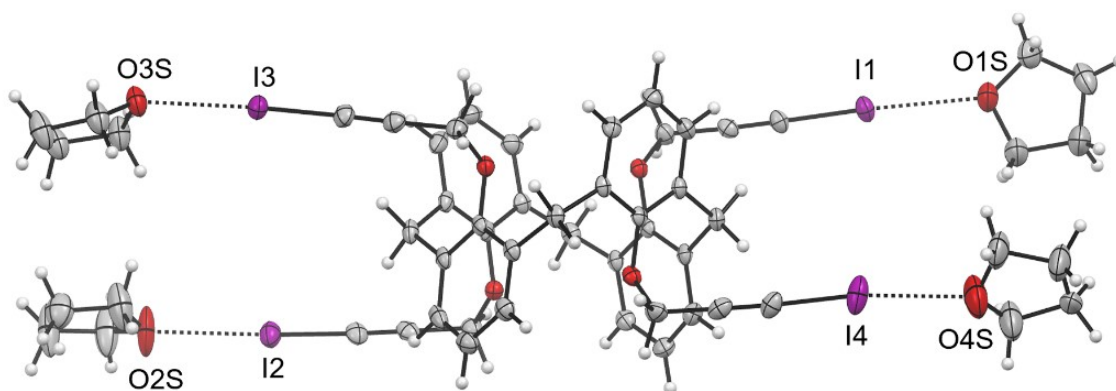

**Figure S6.** Ortep drawing of **4·4THF**, with thermal ellipsoids drawn at the 30% probability level.



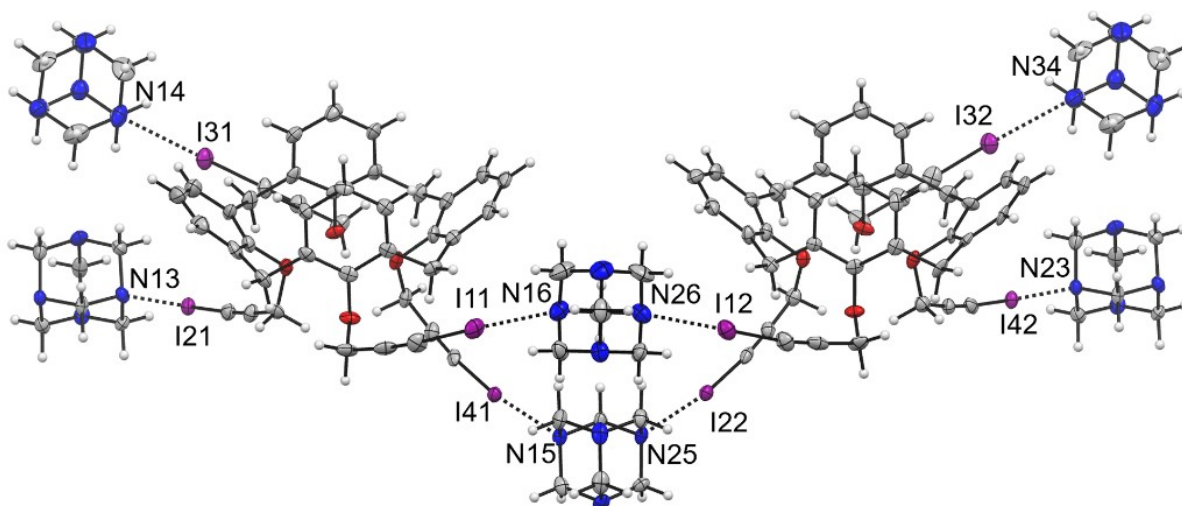

**Figure S7.** Ortep diagram showing the molecular structure and portion of the supramolecular interactions of **1**·2HMTA·3/2CH<sub>2</sub>Cl<sub>2</sub>, with thermal ellipsoids drawn at the 30% probability level. Solvent of crystallization is omitted for clarity.

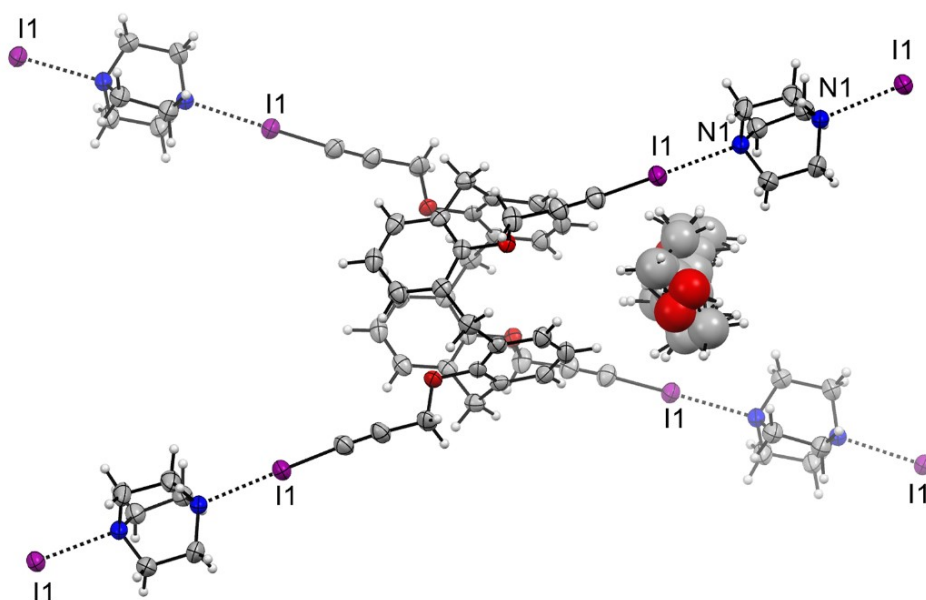

**Figure S8.** Ortep diagram showing the molecular structure and supramolecular interactions of **4**·4DABCO·THF, with thermal ellipsoids drawn at the 30% probability level. Disordered THF is reported with isotropic thermal parameters.
